# Supplementary material for: Vanillin-grafted organosilicon backbone polyimide resins with low dielectric, reprocessing and monomer recovery properties
Source: Royal Society of Chemistry journal article supplement (doi:10.1039/d4tc04573d), 2024-12-23
Supplement: d4tc04573d1.pdf [file d4tc04573d1.pdf]

## Supporting Information

### **Vanillin-grafted organosilicon backbone polyimide resins with low dielectric, reprocessing and monomer recovery**

Guoming Yuan<sup>a,b,c,d</sup>, Hui Yang<sup>a,b,c,d</sup>, Zhijun Liu<sup>a,b,c,d</sup>, Yuemiao Zhang<sup>a,b,c,d</sup>, Yanhan Tao<sup>a,b,c,d</sup>, Bo Yang<sup>a,b,c,d</sup>, Kun Wu<sup>a,d\*</sup>, Jun Shi<sup>a,d</sup>, Li Yang<sup>e</sup>

a Guangzhou Institute of Chemistry, Chinese Academy of Sciences, Guangzhou 510650, PR China.

b CAS Engineering Laboratory for Special Fine Chemicals, Guangzhou 510650, China.

c CASH GCC Shaoguan Research Institute of Advanced Materials, Nanxiong 512400, PR China.

d University of Chinese Academy of Sciences, Beijing 101408, PR China.

e Nanxiong Science and Technology Development Service Center, Shaoguan 512023, PR China.

Section 1. Supplementary Figures.

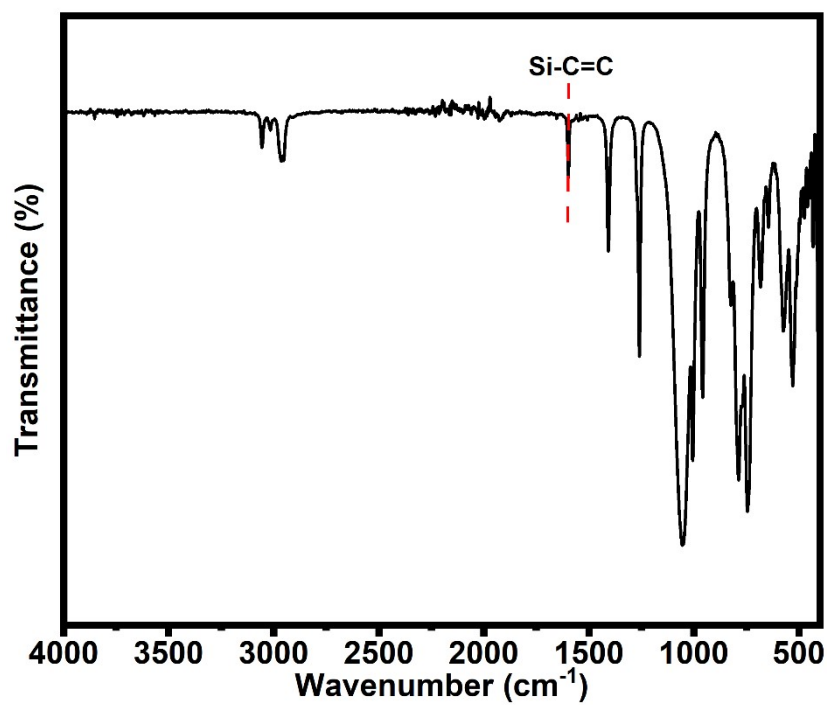

Figure S1. FTIR spectrum of D<sub>4</sub><sup>Vi</sup>

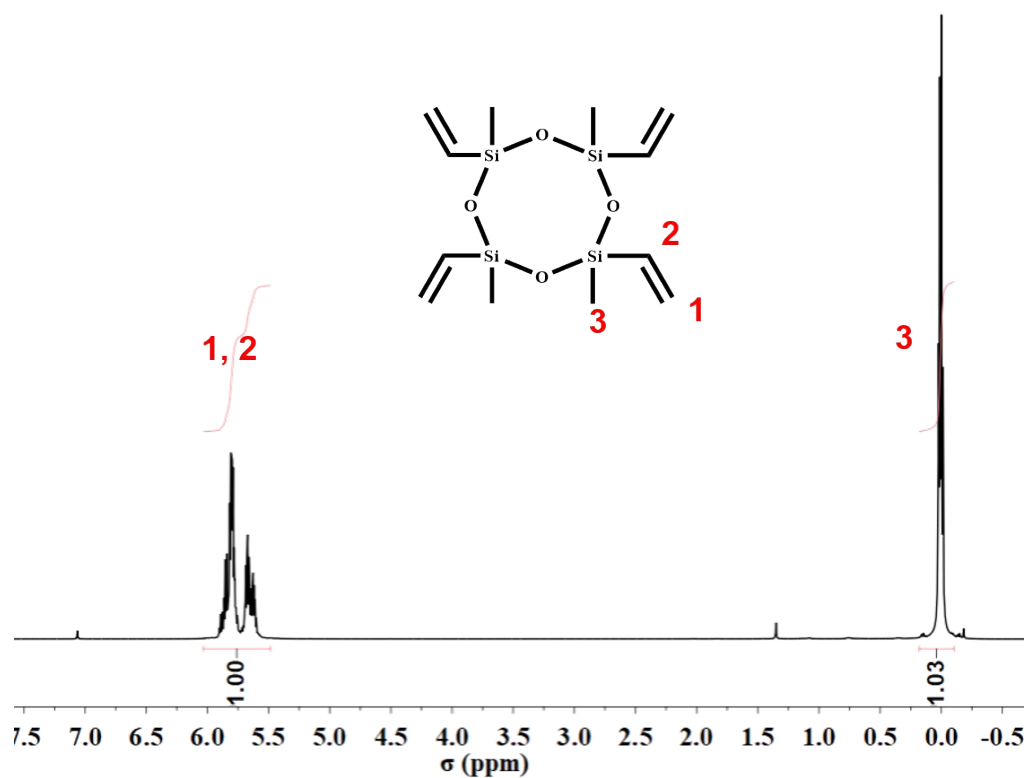

Figure S2. <sup>1</sup>H NMR spectrum of D<sub>4</sub><sup>Vi</sup>

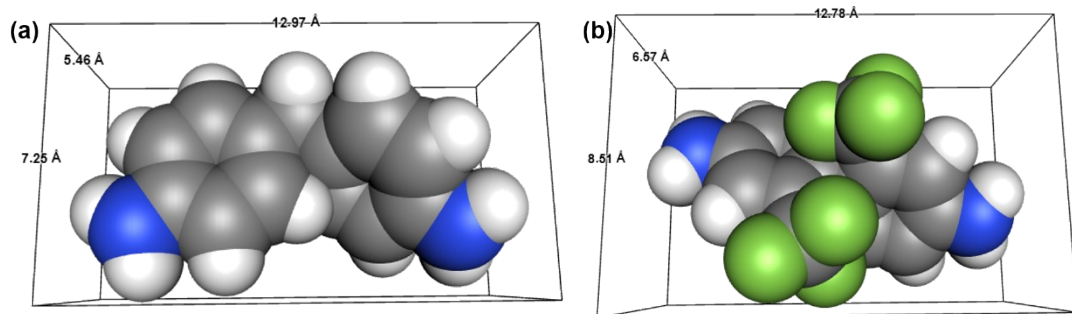

Figure S3. molecular size of (a) DDM and (b) TFDB

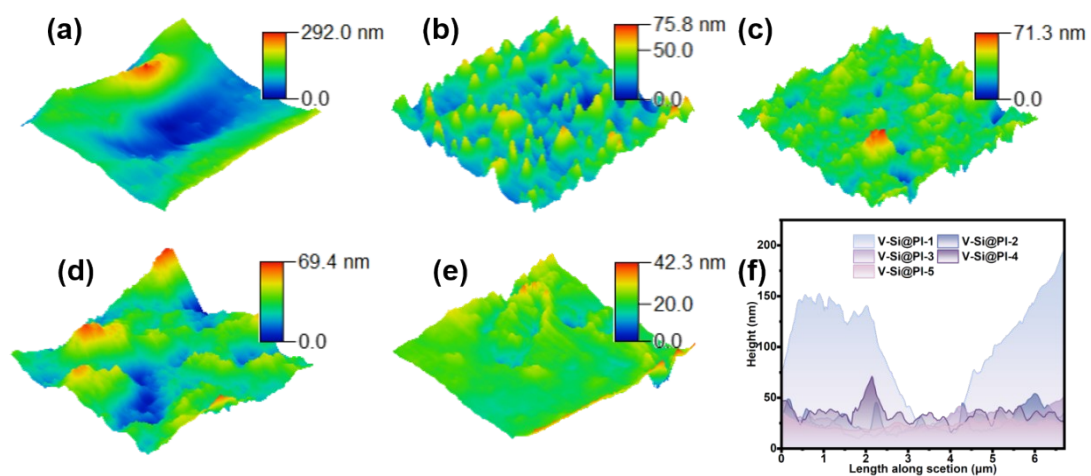

Figure S4. AFM-3D of (a) V-Si@PI-1 , (b) V-Si@PI-2, (c) V-Si@PI-3, (d) V-Si@PI-4, and (e) V-Si@PI-5. (f) Surface height curves of the series V-Si@PI-x

## Section 2. Supplementary Tables.

Table S1. ingredients proportion of the series V-Si@PI-x

|         | V-D <sub>4</sub> (mmol) | DDM (mmol) | TFDB (mmol) |
|---------|-------------------------|------------|-------------|
| Si@PI-1 | 2                       | 4          | —           |
| Si@PI-2 | 2                       | 3          | 1           |
| Si@PI-3 | 2                       | 2          | 2           |
| Si@PI-4 | 2                       | 1          | 3           |
| Si@PI-5 | 2                       | —          | 4           |

Table S2. Swelling ratio ( $W_{SR}$ ) and gel content  $W_G$  of the series V-Si@PI-x

|              | Si@PI-1  | Si@PI-2  | Si@PI-3  | Si@PI-4  | Si@PI-5   |
|--------------|----------|----------|----------|----------|-----------|
| $W_{SR}$ (%) | 5.1±0.21 | 6.4±0.35 | 6.9±0.28 | 8.2±0.46 | 10.8±0.43 |
| $W_G$ (%)    | 86.9±3.8 | 87.6±4.2 | 90.3±5.1 | 91.7±4.8 | 93.8±4.6  |

Table S3. Glass transition temperature, storage modulus, crosslink density and Tensile modulus of the series V-Si@PI-x

|                                      | V-Si@PI-1 | V-Si@PI-2 | V-Si@PI-3 | V-Si@PI-4 | V-Si@PI-5 |
|--------------------------------------|-----------|-----------|-----------|-----------|-----------|
| $T_g$ (°C)                           | 89.78     | 91.4      | 91.78     | 95.36     | 97.09     |
| Storage modulus (Mpa, 40 °C)         | 1222      | 1273      | 1331      | 1412      | 1500      |
| Storage modulus (Mpa, $T_{g+30}$ °C) | 18.4      | 16.44     | 15.84     | 14.71     | 12.75     |
| $V_e^a$ (mol/m <sup>3</sup> )        | 5632.39   | 5011.76   | 4824.20   | 4439.80   | 3831.23   |
| Tensile modulus (GPa, RT)            | 1.01      | 1.19      | 1.41      | 1.38      | 1.58      |

$$V_e^a = \frac{G_{Tg+30^\circ C}}{RT}$$

Table S4.  $T_{d,5\%}$ ,  $T_{d,30\%}$ ,  $T_{max}$ , and Residual mass of the series V-Si@PI-x

|               | V-Si@PI-1 | V-Si@PI-2 | V-Si@PI-3 | V-Si@PI-4 | V-Si@PI-5 |
|---------------|-----------|-----------|-----------|-----------|-----------|
| $T_{d,5\%}$   | 238.61    | 243.79    | 257.36    | 264.28    | 268.79    |
| $T_{d,30\%}$  | 397.71    | 397.30    | 380.30    | 383.77    | 382.79    |
| $T_{max}$     | 322.41    | 330.23    | 339.67    | 338.32    | 349.93    |
| Residual mass | 52.27     | 51.16     | 46.82     | 44.09     | 42.30     |

Table S5. Elemental content of the series V-Si@PI-x

|           | Atomic content (%) |       |       |      |      |
|-----------|--------------------|-------|-------|------|------|
|           | C                  | N     | O     | F    | Si   |
| V-Si@PI-1 | 64.37              | 14.08 | 14.77 | 0.44 | 6.34 |
| V-Si@PI-2 | 64.61              | 15.86 | 13.07 | 2.89 | 3.57 |
| V-Si@PI-3 | 63.67              | 15.61 | 13.26 | 4.19 | 3.28 |
| V-Si@PI-4 | 58.87              | 13.80 | 15.46 | 4.59 | 7.28 |
| V-Si@PI-5 | 58.45              | 13.17 | 14.22 | 6.60 | 7.56 |

Table S6.  $D_k$ ,  $D_f$ , d-spacing, and Ra of the series V-Si@PI-x

|                                      | V-Si@PI-1 | V-Si@PI-2 | V-Si@PI-3 | V-Si@PI-4 | V-Si@PI-5 |
|--------------------------------------|-----------|-----------|-----------|-----------|-----------|
| <b><math>D_k</math> (at 100 MHz)</b> | 3.08      | 2.70      | 2.45      | 2.38      | 2.33      |
| <b><math>D_f</math> (at 100 MHz)</b> | 0.0101    | 0.0073    | 0.0047    | 0.0038    | 0.0030    |
| <b>d-spacing (Å)</b>                 | 4.048     | 4.076     | 4.109     | 4.157     | 4.219     |
| <b>Ra (nm)</b>                       | 39.73     | 8.60      | 8.54      | 6.26      | 3.09      |

Table S6. Dielectric properties, recycling and hydrophobicity of V-Si@PI-3 and published low dielectric materials containing dynamically reversible bonds

| Samples          | $D_k$ | $D_f$  | Reprocess ability | Monomer recovery | WCA (°) | Ref       |
|------------------|-------|--------|-------------------|------------------|---------|-----------|
| <b>OBBBMA</b>    | 3.06  | 0.030  |                   |                  |         | 29        |
| <b>CIP1.0</b>    | 4.50  | 0.045  | Yes               | No               |         | 53        |
| <b>DGEBA/TAI</b> | 3.37  | 0.013  | Yes               | No               |         | 54        |
| <b>C80-PSVMb</b> | 2.55  | 0.0019 | Yes               | No               |         | 55        |
| <b>POF-0.20</b>  | 2.25  | 0.018  | Yes               | No               |         | 56        |
| <b>ETOD-SA</b>   | 2.75  | 0.016  | Yes               | Yes              |         | 19        |
| <b>V-Si@PI-3</b> | 2.45  | 0.0047 | Yes               | Yes              | 119.6   | This work |

## References

- 19 M. Chen, W. Luo, S. Lin, B. Zheng and H. Zhang, *Compos. Part B Eng.*, 2023, **257**, 110666.
- 29 X. Zhang, J. Wu, Z. Qin, L. Qian, L. Liu, W. Zhang and R. Yang, *ACS Appl. Polym. Mater.*, 2022, **4**, 2604–2613.
- 53 G. Ye, C. Wang, Q. Zhang, P. Song, H. Wang, S. Huo and Z. Liu, *Int. J. Biol. Macromol.*, 2024, **278**, 134933.
- 54 J. Liu, X. Liu, X. Cui, J. Qin, M. Shi, D. Wang, L. Liang and C. Yang, *ACS Appl. Polym. Mater.*, 2023, **5**, 10042–10052.
- 55 S. Wang, L. Wang, B. Wang, H. Su, W. Fan and X. Jing, *Polymer*, 2021, **233**, 124214.
- 56 K. Luo, G. Song, Y. Wang, J. Yu, J. Zhu and Z. Hu, *ACS Appl. Polym. Mater.*, 2019, **1**, 944–952.
